# Supplementary material for: Cellular features of localized microenvironments in human meniscal degeneration: a single-cell transcriptomic study
Source: eLife. 2022 Dec 22;11:e79585. doi: 10.7554/eLife.79585 (PMC9779791; doi:10.7554/eLife.79585)
Supplement: Supplementary file 1. — A table contains the descriptions of sample names, cell counts, cell viabilities, sample volumes, estimated numbers of cells loaded, donor states, donor genders, anatomical locations, estimated numbers of cells after filtering, body mass index (BMI) of donor, and ages of donor. [file elife-79585-supp1.xlsx]

## Sheet: Sheet1
sample name	cell count (cells/μL)	viability	sample volume (μL)	cell loaded	donor status	donor sex	anatomy	cells after filtering	BMI	Age
A1outer	400	0.87	33.3	13320	degenerated	female	outer meniscus	4803	25.2	67
A2inner	500	0.828	33.3	16650	degenerated	female	inner meniscus	5665	25.2	67
B1inner	1040	0.721	17.4	18096	degenerated	female	inner meniscus	2179	30.1	59
B2outer	822	0.787	21.8	17919	degenerated	female	outer meniscus	2414	30.1	59
C1inner	959	0.793	19.3	18508	degenerated	female	inner meniscus	5118	26.2	61
D2outer	376	0.654	33.3	12520	degenerated	female	outer meniscus	3303	24.8	72
E1inner	1100	0.7	17.4	19140	normal	female	inner meniscus	3646	20.9	44
E2outer	1200	0.8	14.5	17400	normal	female	outer meniscus	5444	20.9	44
F9inner	500	0.8	21.8	10900	normal	female	inner meniscus	5466	17.4	21
F10outer	800	0.8	11.6	9280	normal	female	outer meniscus	3228	17.4	21
G11outer	1200	0.75	14.5	17400	normal	male	outer meniscus	4122	21.2	50
H12inner	250	0.67	33.8	8450	normal	male	inner meniscus	356	17.3	23
