# Supplementary material for: Cellular features of localized microenvironments in human meniscal degeneration: a single-cell transcriptomic study
Source: eLife. 2022 Dec 22;11:e79585. doi: 10.7554/eLife.79585 (PMC9779791; doi:10.7554/eLife.79585)
Supplement: Supplementary file 2. — A list of differentially expressed genes of each cluster. The table contains gene symbols, corresponding clusters, average log2 fold-change values, percents of cells expressing this gene in groups 1 and 2, p values, and adjusted p-values. [file elife-79585-supp2.xlsx]

## Sheet: Sheet1
rowid	avg_log2FC	pct.1	pct.2	pct.1-pct.2	p_val_adj	p_val	cluster	gene
CHI3L1	4.48219	0.695	0.181	0.514	0	0	Ch.1(CHAD)	CHI3L1
CHI3L2	3.47598	0.714	0.365	0.349	0	0	Ch.1(CHAD)	CHI3L2
CP	2.54423	0.403	0.055	0.348	0	0	Ch.1(CHAD)	CP
SERPINA1	2.26488	0.583	0.211	0.372	0	0	Ch.1(CHAD)	SERPINA1
APOD	2.10724	0.349	0.047	0.302	0	0	Ch.1(CHAD)	APOD
C2orf40	1.97553	0.747	0.436	0.311	0	0	Ch.1(CHAD)	C2orf40
GPX3	1.80381	0.782	0.499	0.283	0	0	Ch.1(CHAD)	GPX3
CTGF	1.72599	0.647	0.588	0.059	9.26343e-265	4.31399e-269	Ch.1(CHAD)	CTGF
MT1X	1.72183	0.879	0.701	0.178	0	0	Ch.1(CHAD)	MT1X
DCN	1.71463	0.967	0.742	0.225	0	0	Ch.1(CHAD)	DCN
CLU	1.6005	0.966	0.601	0.365	0	0	Ch.1(CHAD)	CLU
FGFBP2	1.51595	0.51	0.258	0.252	0	0	Ch.1(CHAD)	FGFBP2
CYR61	1.51082	0.534	0.455	0.079	1.38694e-206	6.45899e-211	Ch.1(CHAD)	CYR61
MT2A	1.38335	0.892	0.8	0.092	0	0	Ch.1(CHAD)	MT2A
NNMT	1.34306	0.842	0.691	0.151	0	0	Ch.1(CHAD)	NNMT
COL1A1	4.34743	0.997	0.325	0.672	0	0	Ch.2(FNDC1)	COL1A1
POSTN	4.02421	0.602	0.035	0.567	0	0	Ch.2(FNDC1)	POSTN
COL1A2	2.99362	1	0.633	0.367	0	0	Ch.2(FNDC1)	COL1A2
TGFBI	2.75585	0.948	0.353	0.595	0	0	Ch.2(FNDC1)	TGFBI
COL3A1	2.70721	0.998	0.539	0.459	0	0	Ch.2(FNDC1)	COL3A1
SPARC	2.69796	0.995	0.62	0.375	0	0	Ch.2(FNDC1)	SPARC
MMP2	2.58801	0.898	0.227	0.671	0	0	Ch.2(FNDC1)	MMP2
SPON2	2.4155	0.725	0.082	0.643	0	0	Ch.2(FNDC1)	SPON2
COL6A1	2.28268	0.993	0.578	0.415	0	0	Ch.2(FNDC1)	COL6A1
C1QTNF3	2.20887	0.679	0.075	0.604	0	0	Ch.2(FNDC1)	C1QTNF3
COL6A3	2.16093	0.977	0.412	0.565	0	0	Ch.2(FNDC1)	COL6A3
FNDC1	2.10335	0.723	0.067	0.656	0	0	Ch.2(FNDC1)	FNDC1
CRABP2	2.06499	0.671	0.082	0.589	0	0	Ch.2(FNDC1)	CRABP2
COL5A1	2.04953	0.921	0.256	0.665	0	0	Ch.2(FNDC1)	COL5A1
COL5A2	2.04556	0.96	0.349	0.611	0	0	Ch.2(FNDC1)	COL5A2
AMTN	4.24828	0.477	0.007	0.47	0	0	Ch.3(PRG4)	AMTN
PRG4	4.17605	0.874	0.176	0.698	0	0	Ch.3(PRG4)	PRG4
CD55	3.37273	0.886	0.308	0.578	0	0	Ch.3(PRG4)	CD55
HTRA1	3.03066	0.979	0.629	0.35	0	0	Ch.3(PRG4)	HTRA1
FN1	2.89759	0.995	0.726	0.269	0	0	Ch.3(PRG4)	FN1
CILP	2.87499	0.908	0.248	0.66	0	0	Ch.3(PRG4)	CILP
DEFB1	2.73667	0.719	0.057	0.662	0	0	Ch.3(PRG4)	DEFB1
CRLF1	2.52022	0.866	0.124	0.742	0	0	Ch.3(PRG4)	CRLF1
CRTAC1	2.38923	0.986	0.462	0.524	0	0	Ch.3(PRG4)	CRTAC1
TNFRSF11B	2.38444	0.74	0.166	0.574	0	0	Ch.3(PRG4)	TNFRSF11B
INHBA	2.34253	0.584	0.139	0.445	0	0	Ch.3(PRG4)	INHBA
FABP3	2.26832	0.446	0.058	0.388	0	0	Ch.3(PRG4)	FABP3
TNFAIP6	2.2145	0.801	0.264	0.537	0	0	Ch.3(PRG4)	TNFAIP6
PRELP	2.09879	0.995	0.602	0.393	0	0	Ch.3(PRG4)	PRELP
PCOLCE2	2.03723	0.951	0.374	0.577	0	0	Ch.3(PRG4)	PCOLCE2
CFD	5.45618	0.781	0.083	0.698	0	0	Ch.4(CFD)	CFD
PLA2G2A1	3.14904	0.423	0.171	0.252	2.46914e-241	1.14988e-245	Ch.4(CFD)	PLA2G2A
SFRP2	2.78806	0.455	0.043	0.412	0	0	Ch.4(CFD)	SFRP2
CXCL12	2.78393	0.749	0.211	0.538	0	0	Ch.4(CFD)	CXCL12
SELENOP	2.53852	0.747	0.15	0.597	0	0	Ch.4(CFD)	SELENOP
CYP1B1	2.45389	0.557	0.119	0.438	0	0	Ch.4(CFD)	CYP1B1
CFH	2.441	0.795	0.328	0.467	0	0	Ch.4(CFD)	CFH
GSN	2.43922	0.929	0.754	0.175	0	0	Ch.4(CFD)	GSN
SERPINF11	2.39272	0.855	0.271	0.584	0	0	Ch.4(CFD)	SERPINF1
EFEMP1	2.39032	0.562	0.143	0.419	0	0	Ch.4(CFD)	EFEMP1
MFAP4	2.28164	0.527	0.13	0.397	0	0	Ch.4(CFD)	MFAP4
FBLN11	2.11835	0.663	0.296	0.367	0	0	Ch.4(CFD)	FBLN1
VCAN1	2.06975	0.685	0.342	0.343	0	0	Ch.4(CFD)	VCAN
APOD1	1.9808	0.322	0.143	0.179	1.26489e-124	5.89061e-129	Ch.4(CFD)	APOD
FBLN2	1.97991	0.466	0.061	0.405	0	0	Ch.4(CFD)	FBLN2
STMN1	3.91865	0.955	0.023	0.932	0	0	Ch.5(cycling)	STMN1
UBE2C	3.21921	0.952	0.005	0.947	0	0	Ch.5(cycling)	UBE2C
PTTG1	3.19564	0.979	0.068	0.911	0	0	Ch.5(cycling)	PTTG1
CENPF	3.09973	0.938	0.007	0.931	0	0	Ch.5(cycling)	CENPF
TUBA1B	3.07116	1	0.595	0.405	1.09473e-188	5.09819e-193	Ch.5(cycling)	TUBA1B
H2AFZ	3.01307	0.986	0.444	0.542	4.98742e-201	2.32265e-205	Ch.5(cycling)	H2AFZ
CKS2	2.81919	0.942	0.12	0.822	0	0	Ch.5(cycling)	CKS2
TUBB2	2.77917	0.979	0.487	0.492	8.51334e-180	3.96467e-184	Ch.5(cycling)	TUBB
HMGB2	2.7695	0.986	0.189	0.797	0	0	Ch.5(cycling)	HMGB2
HIST1H4C	2.65185	0.897	0.216	0.681	7.16286e-218	3.33575e-222	Ch.5(cycling)	HIST1H4C
BIRC5	2.62986	0.949	0.005	0.944	0	0	Ch.5(cycling)	BIRC5
CDKN3	2.60303	0.884	0.034	0.85	0	0	Ch.5(cycling)	CDKN3
PCLAF	2.49727	0.89	0.015	0.875	0	0	Ch.5(cycling)	PCLAF
TUBB4B	2.48286	0.969	0.304	0.665	4.5486e-214	2.11829e-218	Ch.5(cycling)	TUBB4B
TOP2A	2.44041	0.894	0.002	0.892	0	0	Ch.5(cycling)	TOP2A
APOE	4.02927	0.53	0.03	0.5	0	0	PCL.1	APOE
RGS5	3.80746	0.681	0.039	0.642	0	0	PCL.1	RGS5
FABP4	2.85506	0.388	0.02	0.368	0	0	PCL.1	FABP4
NR2F2	2.62718	0.689	0.077	0.612	0	0	PCL.1	NR2F2
LGI4	2.59409	0.63	0.045	0.585	0	0	PCL.1	LGI4
STEAP4	2.58203	0.651	0.094	0.557	0	0	PCL.1	STEAP4
TINAGL1	2.46271	0.704	0.057	0.647	0	0	PCL.1	TINAGL1
IFITM11	2.24216	0.702	0.255	0.447	0	0	PCL.1	IFITM1
ARHGDIB	2.135	0.521	0.041	0.48	0	0	PCL.1	ARHGDIB
IGFBP71	2.03001	0.967	0.784	0.183	0	0	PCL.1	IGFBP7
SYNPO2	2.02054	0.431	0.033	0.398	0	0	PCL.1	SYNPO2
NOTCH3	1.95854	0.554	0.111	0.443	0	0	PCL.1	NOTCH3
COL18A1	1.94767	0.545	0.192	0.353	0	0	PCL.1	COL18A1
CPE	1.89437	0.512	0.109	0.403	0	0	PCL.1	CPE
MT1A	1.84347	0.408	0.183	0.225	2.09781e-242	9.76954e-247	PCL.1	MT1A
ACTA21	4.24196	0.976	0.161	0.815	0	0	PCL.2	ACTA2
TAGLN1	4.11787	0.99	0.282	0.708	0	0	PCL.2	TAGLN
MYL91	4.08647	0.984	0.389	0.595	0	0	PCL.2	MYL9
MYH11	3.8908	0.795	0.021	0.774	0	0	PCL.2	MYH11
PLN	3.72756	0.779	0.023	0.756	0	0	PCL.2	PLN
TPM21	3.50738	0.941	0.498	0.443	0	0	PCL.2	TPM2
C11orf961	3.48702	0.848	0.195	0.653	0	0	PCL.2	C11orf96
PPP1R14A1	3.39362	0.737	0.047	0.69	0	0	PCL.2	PPP1R14A
SORBS2	3.32783	0.771	0.159	0.612	0	0	PCL.2	SORBS2
SPARCL12	3.0273	0.914	0.228	0.686	0	0	PCL.2	SPARCL1
RERGL	3.009	0.553	0.002	0.551	0	0	PCL.2	RERGL
HES41	2.90531	0.673	0.091	0.582	0	0	PCL.2	HES4
LMOD11	2.83994	0.637	0.037	0.6	0	0	PCL.2	LMOD1
SNCG	2.82165	0.624	0.117	0.507	0	0	PCL.2	SNCG
ADIRF1	2.7707	0.995	0.851	0.144	0	0	PCL.2	ADIRF
